# Supplementary material for: Association between the return-to-work hierarchy and self-rated health, self-esteem, and self-efficacy
Source: Springer Nature journal article supplement (doi:10.1007/s00420-019-01406-7), 2019-02-13
Supplement: MOESM1 [file 16468906]

Table A1. Adjusted odds ratios for better self-rated health, higher self-esteem, and higher self-efficacy according to the return-to-work hierarchy

|  |  | Self-rated health | |  | Self-esteem | |  | Self-efficacy | |
| --- | --- | --- | --- | --- | --- | --- | --- | --- | --- |
|  |  | OR | (95% CI) |  | OR | (95% CI) |  | OR | (95% CI) |
| RTW hierarchy |  |  |  |  |  |  |  |  |  |
| Class 1 |  | 1.00 |  |  | 1.00 |  |  | 1.00 |  |
| Class 2 |  | 0.54 | (0.30–0.97) |  | 0.79 | (0.44–1.39) |  | 0.88 | (0.50–1.55) |
| Class 3 |  | 0.47 | (0.35–0.64) |  | 0.73 | (0.55–0.96) |  | 0.80 | (0.61–1.06) |
| Class 4 |  | 0.49 | (0.38–0.63) |  | 0.68 | (0.54–0.86) |  | 0.66 | (0.52–0.83) |
| Age |  |  |  |  |  |  |  |  |  |
| <40 |  | 1.00 |  |  | 1.00 |  |  | 1.00 |  |
| 40-49 |  | 0.53 | (0.38–0.76) |  | 0.89 | (0.66–1.21) |  | 0.79 | (0.58–1.07) |
| 50-59 |  | 0.53 | (0.37–0.76) |  | 0.94 | (0.68–1.30) |  | 0.76 | (0.55–1.05) |
| ≥60 |  | 0.67 | (0.43–1.06) |  | 0.84 | (0.56–1.27) |  | 0.69 | (0.46–1.05) |
| Sex |  |  |  |  |  |  |  |  |  |
| Male |  | 1.00 |  |  | 1.00 |  |  | 1.00 |  |
| Female |  | 1.21 | (0.80–1.83) |  | 0.85 | (0.58–1.25) |  | 0.55 | (0.38–0.81) |
| Education level |  |  |  |  |  |  |  |  |  |
| Less than high school |  | 1.00 |  |  | 1.00 |  |  | 1.00 |  |
| High school |  | 1.68 | (1.28–2.19) |  | 1.12 | (0.87–1.45) |  | 1.13 | (0.88–1.46) |
| College or above |  | 1.59 | (1.06–2.38) |  | 1.38 | (0.95–2.01) |  | 1.50 | (1.04–2.18) |
| Chronic disease |  |  |  |  |  |  |  |  |  |
| No |  | 1.00 |  |  | 1.00 |  |  | 1.00 |  |
| Yes |  | 0.43 | (0.32–0.57) |  | 0.87 | (0.65–1.15) |  | 1.11 | (0.83–1.47) |
| Smoking |  |  |  |  |  |  |  |  |  |
| Never |  | 1.00 |  |  | 1.00 |  |  | 1.00 |  |
| Current |  | 0.92 | (0.67–1.28) |  | 0.78 | (0.57–1.06) |  | 0.81 | (0.60–1.10) |
| Former |  | 1.12 | (0.77–1.62) |  | 0.88 | (0.62–1.24) |  | 0.90 | (0.64–1.27) |
| Alcohol consumption |  |  |  |  |  |  |  |  |  |
| No |  | 1.00 |  |  | 1.00 |  |  | 1.00 |  |
| Yes |  | 1.20 | (0.92–1.56) |  | 1.14 | (0.89–1.47) |  | 1.01 | (0.79–1.30) |
| Occupation |  |  |  |  |  |  |  |  |  |
| White collar |  | 1.00 |  |  | 1.00 |  |  | 1.00 |  |
| Blue collar |  | 1.06 | (0.76–1.47) |  | 0.76 | (0.56–1.03) |  | 0.72 | (0.53–0.97) |
| Accident type |  |  |  |  |  |  |  |  |  |
| Injury |  | 1.00 |  |  | 1.00 |  |  | 1.00 |  |
| Disease |  | 0.51 | (0.35–0.75) |  | 1.69 | (1.14–2.51) |  | 1.25 | (0.86–1.81) |
| Grade |  |  |  |  |  |  |  |  |  |
| No grade |  | 1.00 |  |  | 1.00 |  |  | 1.00 |  |
| 1-7 |  | 0.36 | (0.19–0.69) |  | 0.60 | (0.33–1.12) |  | 0.52 | (0.27–0.97) |
| 8-10 |  | 0.45 | (0.31–0.66) |  | 0.60 | (0.42–0.85) |  | 0.61 | (0.44–0.87) |
| 11-12 |  | 0.53 | (0.38–0.75) |  | 0.73 | (0.54–0.99) |  | 0.84 | (0.62–1.13) |
| 13-14 |  | 0.63 | (0.45–0.89) |  | 0.85 | (0.63–1.16) |  | 1.01 | (0.75–1.37) |

Table A2. Multivariate regression analyses for better self-rated health, higher self-esteem, and higher self-efficacy according to the return-to-work hierarchy

|  | Crude | | | |  | Adjusted* | | | |
| --- | --- | --- | --- | --- | --- | --- | --- | --- | --- |
|  | Beta | (SE) | F(df) | p-value |  | Beta | (SE) | F(df) | p-value |
| Self-esteem |  |  | 11.56(3) | <0.001 |  |  |  | 7.95(12) | <0.001 |
| Class 1 | Ref |  |  |  |  | Ref |  |  |  |
| Class 2 | -0.68 | (0.59) |  | 0.252 |  | -0.62 | (0.59) |  | 0.263 |
| Class 3 | -1.22 | (0.29) |  | <0.001 |  | -0.93 | (0.30) |  | 0.001 |
| Class 4 | -1.34 | (0.25) |  | <0.001 |  | -1.09 | (0.24) |  | <0.001 |
|  |  |  |  |  |  |  |  |  |  |
| Self-efficacy |  |  | 6.10(3) | <0.001 |  |  |  | 8.98(12) | <0.001 |
| Class 1 | Ref |  |  |  |  | Ref |  |  |  |
| Class 2 | -0.82 | (1.45) |  | 0.574 |  | -0.89 | (1.44) |  | 0.539 |
| Class 3 | -1.88 | (0.72) |  | 0.009 |  | -1.13 | (0.72) |  | 0.114 |
| Class 4 | -2.47 | (0.60) |  | <0.001 |  | -1.68 | (0.59) |  | 0.005 |
| Class 1: same employer, same job; Class 2: same employer, different job;  Class 3: different employer, same job; Class 4: different employer, different job  * Adjusted for age, sex, education level, chronic diseases, smoking, alcohol consumption, occupation, accident type, and disability severity | | | | | | | | | |
